# Supplementary material for: Glycemic Index and Dietary Fiber and the Risk of Type 2 Diabetes
Source: Oxford University Press journal article supplement (doi:10.2337/diacare.27.11.2701), 2004-11-01
Supplement: 2701-sup-dc040773_appendix.doc [file 2701-sup-dc040773_appendix.doc]

| Food class | Individual items included in food class |
| --- | --- |
| Total cereal | Wheatgerm; muesli; other breakfast cereal; boiled rice (including brown); fried rice; mixed dishes with rice; white bread, rolls, or toast; whole-wheat or rye bread, rolls, or toast; fruit bread; crackers or crispbreads; sweet biscuits; cakes/sweet pastries; puddings; pasta/noodles; pizza; dim sims/spring rolls; pies/savory pastries |
| Breakfast cereals | Wheatgerm, muesli, other breakfast cereal |
| Rice | Boiled rice (including brown), fried rice, mixed dishes with rice |
| Bread | White bread, rolls, or toast; whole-wheat or rye bread, rolls, or toast |
| White bread | White bread, rolls, or toast |
| Whole-meal bread | Whole-wheat or rye bread, rolls, or toast |
| Savory cereal-based products | Pizza, dim sims/spring rolls, pies/savory pastries |
| Pasta | Pasta/noodles |
| Other cereal products | Fruit bread, crackers or crispbreads, sweet biscuits, cakes/sweet pastries, puddings |
| Vegetables | Garlic; bean, pea, or lentil soup; pickled vegetables; tomato; capsicum; lettuce, endive, or other salad greens; cucumber; celery or fennel; beetroot; coleslaw; carrot; cabbage or brussel sprouts; cauliflower; broccoli; silverbeet, spinach, or other leafy greens; green beans or peas; cooked dried bean, chickpea, or lentil dish (including baked beans); pumpkin; onion or leeks; mushrooms; sweetcorn; zucchini, squash, or eggplant; cooked mixed-vegetable dish |
| Potatoes | Potato, fried or roasted; potato, cooked without fat |
| Legumes | Bean, pea, or lentil soup; green beans or peas; cooked dried bean, chickpea, or lentil dish (including baked beans) |
| Fruit | Dried apricot or peaches; other dried fruit; fruit salad; oranges or mandarins; apples, bananas; peaches or nectarines; pears; cantaloupe or honeydew melon; watermelon; strawberries; plums; apricots; grapefruit; pineapple; figs; grapes; orange juice; fruit juice |
